# Supplementary material
Source: PubMed Central journal article supplement (PMC3249679)
Supplement: supp_en.2011-1325_EN-11-1325methods10tables4figs_.pdf [file supp_en.2011-1325_EN-11-1325methods10tables4figs_.pdf]

## Spearman's rank correlation coefficient analysis

To determine whether there are differences between the microarray data received from T3 and GC-1 treatments, we used the Spearman's rank order correlation coefficient,  $r_s$ ,

$$r_s = 1 - \frac{6\sum d_i^2}{n(n^2 - 1)}$$

where  $d$  is the difference between the probe-set rank in one dataset (T3) and that of the other (GC-1), and  $n$  is the number of probe-sets being compared. We decided to conduct the analysis with Affymetrix probe-set identifications instead of aggregating probe-sets into unified identifiers (e.g., Unigene) to eliminate the impact of splice variants.

Affymetrix probe-sets for both datasets were ordered based upon fold induction of ligand-treated versus vehicle. We analyzed both the entire Affymetrix probe-set list ("complete probe-set list"), and probe-sets receiving an adjusted p-value  $\leq 0.05$  in both datasets ("significant probe-sets").

To determine if the calculated correlation coefficient,  $r_s$ , is greater than would be expected by chance, we performed empirical permutation analysis, where the rank-ordering of the genes in one list is randomly shuffled, followed by  $r_s$  calculation. The permutation analysis was done 10,000 times using a custom Python script. The p-value is simply the proportion of times that the  $r_s$  value in the shuffled list is greater than or equal to the correlation coefficient calculated for the experimental dataset.

In no instance were the shuffled lists  $r_s$  greater or equal to that received for **either any** experimental datasets ([HepG2 dataset example](#) see [Figures](#) below).

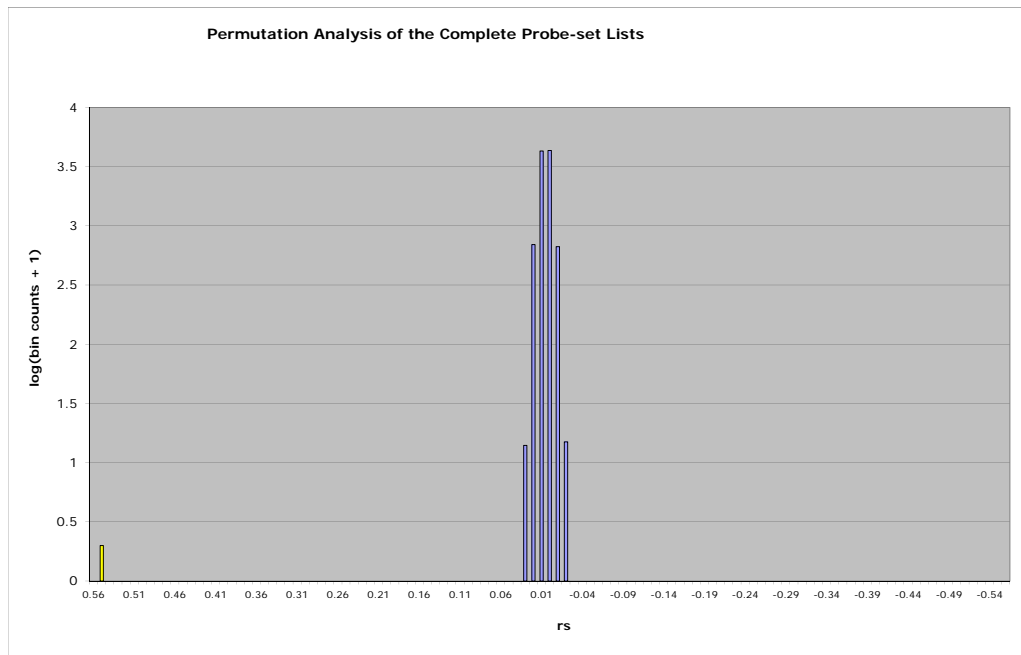

### Permutation Analysis of the Significant Probe-set Lists

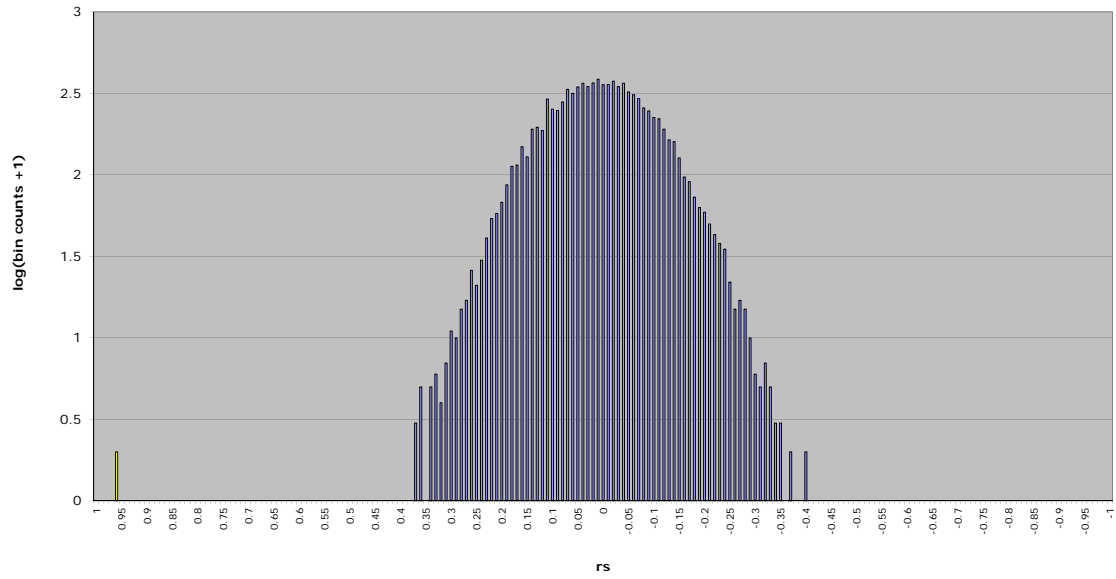

**Fig. S1.** Verification of hypothyroid status of mice. Induction of hypothyroidism was confirmed by decreased total thyroxine ( $T_4$ ) levels in blood serum, bar graph represents  $T_4$  levels in different conditions. The slight increase in reactivity in animals after  $T_3$  gavage represents cross-reactivity with  $T_3$ .

**Fig. S2.** HepG2 cells express TR transcripts. The figure shows RT-PCR results with  $Tr\beta 1$  and  $TR\alpha 1$  primers relative to GAPDH. There is a slight increase in  $TR\beta 1$  expression after ligand treatment, but this did not reach statistical significance.

**Fig. S3.** Q-PCR analysis confirms that predicted  $T_3$ -inducible genes are not upregulated in liver of  $T_3$  or GC-1-treated mice (A) or HepG2 cells (B) in conditions of our experiments.

**Fig. S4.** Ligand dose responses with standard TRE-driven reporter gene in HepG2 cells transfected with  $TR\beta$  or  $TR\alpha$ . There is a significant rightward shift in GC-1 dose response obtained with GC-1 in the presence of  $TR\alpha$ .

Table S1.

PCR primers for mouse liver Q-PCR.

---

| Symbol  | Gene Name                                                | TaqMan Assay ID |
|---------|----------------------------------------------------------|-----------------|
| ANGPTL4 | angiopoietin-like-4                                      | Mm00480431_m1   |
| CPT1a   | carnitine palmitoyltransferase 1a, liver                 | Mm00550438_m1   |
| DIO1    | deiodinase, iodothyronine, type I                        | Mm00839358_m1   |
| G6PC    | glucose-6-phosphatase, catalytic                         | Mm00839363_m1   |
| GPD2    | glycerol phosphate dehydrogenase 2, mitochondrial        | Mm00439082_m1   |
| IDH3a   | isocitrate dehydrogenase 3 (NAD <sup>+</sup> ) alpha     | Mm00499674_m1   |
| MCAD    | acyl-Coenzyme A dehydrogenase, medium chain              | Mm00431611_m1   |
| ME1     | malic enzyme 1, NADP(+)-dependent, cytosolic             | Mm00782380_s1   |
| PCK1    | phosphoenolpyruvate carboxykinase 1, cytosolic           | Mm01247058_m1   |
| SREBP1c | sterol regulatory element binding transcription factor 1 | Mm01138344_m1   |
| THRSP   | thyroid hormone responsive                               | Mm01273967_m1   |

---

## Sequences of primers for HepG2 QPCR\*

| Symbol | Accession Number | Gene Name                                              | Sequence (forward)          | Sequence (reverse)            |
|--------|------------------|--------------------------------------------------------|-----------------------------|-------------------------------|
| G6PC*  | NM_000151        | Glucose-6-phosphatase, catalytic subunit               | gctgctcatttctcatcaa         | ttctgtaacagcaatgcctga         |
| PCK1*  | NM_002591        | Phosphoenolpyruvate carboxykinase 1                    | agatggaggaagagggcatc        | ggtcagtgagagccaaccag          |
| ACSM2  | NM_182617        | Acyl-CoA synthetase medium-chain family member 2       | gaggtggtgaaggcatttgt        | ggtgagctgttctgggtcat          |
| ACSL6  | NM_001009185     | acyl-CoA synthetase long-chain family member 6         | atctttccgagacaggacga        | cgtggcaatagacgacagac          |
| CPT1A* | NM_001876        | Carnitine palmitoyltransferase 1A (liver)              | tggtgggctacaaattacgtg       | atagttgctgttcacatgagc         |
| THRSP* | NM_003251        | Thyroid hormone responsive protein                     | tcatgcacctcaccgaga          | gtcttctatcatgtgaagggatct<br>t |
| FXR    | NM_005123        | Nuclear receptor subfamily 1, group H, member 4        | gaggaagactcagtccagaatc<br>c | ccttctacgatgtcttctacctcct     |
| ABCB4  | NM_000443        | ATP-binding cassette, sub-family B (MDR/TAP), member 4 | gcatcagcagcaaacacaaaa       | tgatggtaccagcgacata           |
| APOC1  | NM_001645        | apolipoprotein C-I                                     | cctccagcaaggattcagag        | caagacgatcgacagaacca          |
| AGPTL4 | NM_139314        | Angiopoietin-like 4                                    | gcaggatccagcaagtcttc        | aaactggctttgcagatgct          |
| DIO1*  | NM_000792        | deiodinase, iodothyronine, type I                      | cactgcctgagaggctctacat<br>a | tgtagttcaagggccagat           |
| CYP3A5 | NM_000777        | Cytochrome P450, family 3, subfamily A, polypeptide 5  | aagaaaagtgcctcaacga         | gagctccagatcagacagagc         |
| ARG1   | NM_000045        | Arginase, liver                                        | ggagaccacagtttgcaat         | ccactgtggtgtcagtgg            |
| SGK    | NM_005627        | Serum/glucocorticoid regulated kinase                  | acccttctctccaccaagt         | cccttccgatcacttcaa            |
| FASN   | NM_004104        | Fatty acid synthase                                    | atgaaggtggtggaggtgct        | ggtggccgtgtagctcag            |

|             |                  |                                                                     |                       |                         |
|-------------|------------------|---------------------------------------------------------------------|-----------------------|-------------------------|
| ACACA       | NM_19883<br>4    | Acetyl-CoA Carboxylase $\alpha$                                     | gcctcttctgacaaaagcag  | tgatctgtgctgcctggag     |
| SLC2A1      | NM_00651<br>6    | solute carrier family 2 (facilitated glucose transporter), member 1 | gggccaagagtgtgctaaag  | tgccgactcttcttcat       |
| PLA2G2A     | NM_00030<br>0    | phospholipase A2, group IIA (platelets, synovial fluid)             | atcgctgctgtgcactcat   | ttgcacaggtgattctgctc    |
| SORBS1      | NM_01538<br>5    | sorbin and SH3 domain containing 1                                  | cagctctgcttcactaaagat | tcatcatgacgtcttcgaataaa |
| SREBP1a     | NM_00417<br>6    | sterol regulatory element binding transcription factor 1            | ctgaccgacatcgaagacat  | caaataggccaggggaagtca   |
| SREBP1c     | NM_00100<br>5291 | sterol regulatory element binding transcription factor 1            | ctgaccgacatcgaagggtg  | gcatgtcttcgaaagtgcaa    |
| ANGPTL<br>3 | NM_01449<br>5    | angiopoietin-like 3                                                 | gggatcacaagcaaaaagga  | accaccagcctcctgaataa    |

\* primers were obtained from ProbeFinder for the Human Universal ProbeLibrary (<http://www.universalprobelibrary.com>) as described in Material and Methods.

Table S2. Induced genes in euthyroid mice ( $\geq 1.7$  fold\*,  $p < 0.05$ )

| Category                              | GeneName      | Accession No. | Fold change |        | Gene coded Protein                                                  |
|---------------------------------------|---------------|---------------|-------------|--------|---------------------------------------------------------------------|
|                                       |               |               | T3          | GC-1   |                                                                     |
| <b>Fat and cholesterol metabolism</b> | Stat5a        | NM_011488     | 2.665       | 2.615  | signal transducer and activator of transcription 5A                 |
|                                       | Ptgis         | NM_008968     | 2.257       | 1.537  | prostaglandin I2 (prostacyclin) synthase                            |
|                                       | Mgll          | NM_011844     | 2.254       | 1.833  | monoglyceride lipase                                                |
|                                       | Acot11        | NM_025590     | 1.996       | 1.932  | acyl-CoA thioesterase 11                                            |
|                                       | Elovl6        | NM_130450     | 1.777       | 1.360  | ELOVL family member 6, elongation of long chain fatty acids (yeast) |
| <b>Lipid metabolism</b>               | Cyp17a1       | NM_007809     | 12.624      | 10.727 | cytochrome P450, family 17, subfamily a, polypeptide 1              |
|                                       | Hsd17b7       | NM_010476     | 1.754       | 1.707  | hydroxysteroid (17-beta) dehydrogenase 7                            |
| <b>Glucose metabolism</b>             | Gpd2          | NM_010274     | 2.606       | 2.501  | glycerol phosphate dehydrogenase 2, mitochondrial                   |
|                                       | Trak2         | NM_172406     | 2.021       | 1.956  | trafficking protein, kinesin binding 2                              |
|                                       | Hs6st1        | NM_015818     | 1.945       | 1.942  | heparan sulfate 6-O-sulfotransferase 1                              |
|                                       | Gne           | NM_015828     | 1.885       | 2.183  | glucosamine                                                         |
| <b>Amino acid metabolism</b>          | Shmt1         | NM_009171     | 2.059       | 1.846  | serine hydroxymethyltransferase 1 (soluble)                         |
|                                       | Prodh         | NM_011172     | 1.978       | 1.999  | proline dehydrogenase                                               |
|                                       | Gstt1         | NM_008185     | 1.860       | 2.262  | glutathione S-transferase, theta 1                                  |
|                                       | Slc22a4       | NM_019687     | 1.720       | 1.804  | solute carrier family 22 (organic cation transporter), member 4     |
| <b>Acetyl-CoA metabolism</b>          | Idh3a         | NM_029573     | 2.616       | 2.073  | isocitrate dehydrogenase 3 (NAD+) alpha                             |
| <b>Nucleotide metabolism</b>          | Bcl3          | NM_033601     | 2.585       | 3.064  | B-cell leukemia/lymphoma 3                                          |
|                                       | Rab34         | NM_033475     | 2.364       | 2.587  | RAB34, member of RAS oncogene family                                |
|                                       | Cebpb         | NM_009883     | 2.141       | 2.131  | CCAAT/enhancer binding protein (C/EBP), beta                        |
|                                       | 2310003H01Rik | NM_027980     | 2.058       | 1.847  | RIKEN cDNA 2310003H01 gene                                          |
|                                       | F2r           | NM_010169     | 2.047       | 1.750  | coagulation factor II (thrombin) receptor                           |
|                                       | Rcl1          | NM_021525     | 2.008       | 2.131  | RNA terminal phosphate cyclase-like 1                               |
|                                       | Nt5e          | NM_011851     | 1.983       | 1.164  | 5' nucleotidase, ecto                                               |
|                                       | Asap2         | NM_001135192  | 1.966       | 1.408  | RIKEN cDNA 6530401G17 gene                                          |
|                                       | Npr2          | NM_173788     | 1.891       | 1.610  | natriuretic peptide receptor 2                                      |
|                                       | Adarb1        | NM_130895     | 1.869       | 1.837  | adenosine deaminase, RNA-specific, B1                               |

|                                                 |               |              |       |       |                                                                               |
|-------------------------------------------------|---------------|--------------|-------|-------|-------------------------------------------------------------------------------|
|                                                 | Zfp810        | NM_145612    | 1.828 | 1.909 | zinc finger protein 810                                                       |
| <b>Bile secretion</b>                           | Slc22a7       | NM_144856    | 3.227 | 3.447 | solute carrier family 22 (organic anion transporter), member 7                |
|                                                 | Atp1b1        | NM_009721    | 1.773 | 1.457 | ATPase, Na <sup>+</sup> /K <sup>+</sup> transporting, beta 1 polypeptide      |
|                                                 | Abcb4         | NM_008830    | 1.718 | 1.571 | ATP-binding cassette, sub-family B (MDR/TAP), member 4                        |
| <b>Cell proliferation &amp; differentiation</b> | Nrp1          | NM_008737    | 2.382 | 2.306 | neuropilin 1                                                                  |
|                                                 | Wipf3         | NM_001167861 | 1.821 | 2.089 | WAS/WASL interacting protein family, member 3                                 |
|                                                 | Ulk1          | NM_009469    | 1.732 | 2.469 | Unc-51 like kinase 1 ( <i>C. elegans</i> )                                    |
|                                                 | Bbs4          | NM_175325    | 1.729 | 1.618 | Bardet-Biedl syndrome 4 (human)                                               |
| <b>Signal transduction</b>                      | Uck1          | NM_011675    | 2.306 | 1.825 | uridine-cytidine kinase 1                                                     |
|                                                 | Tns1          | NM_027884    | 2.063 | 2.168 | tensin 1                                                                      |
|                                                 | Rab43         | NM_133717    | 1.966 | 2.306 | RAB43, member RAS oncogene family                                             |
|                                                 | Gna14         | NM_008137    | 1.877 | 1.646 | guanine nucleotide binding protein, alpha 14                                  |
|                                                 | Cblc          | NM_023224    | 1.776 | 1.790 | Casitas B-lineage lymphoma c                                                  |
| <b>Hormone activity regulation</b>              | Thrsp         | NM_009381    | 3.203 | 3.770 | thyroid hormone responsive SPOT14 homolog ( <i>Rattus</i> )                   |
|                                                 | Snx10         | NM_028035    | 1.911 | 2.316 | sorting nexin 10                                                              |
|                                                 | Ttr           | NM_013697    | 1.735 | 1.757 | transthyretin                                                                 |
| <b>Others</b>                                   | Crybb3        | NM_021352    | 6.474 | 8.732 | crystallin, beta B3                                                           |
|                                                 | Tsku          | NM_001168541 | 5.693 | 4.658 | tsukushin                                                                     |
|                                                 | 9030619P08Rik | NM_001039720 | 4.307 | 4.287 | RIKEN cDNA 9030619P08 gene                                                    |
|                                                 | Mmd2          | NM_175217    | 3.823 | 3.030 | monocyte to macrophage differentiation-associated 2                           |
|                                                 | Wfdc16        | NM_001012723 | 3.537 | 3.390 | WAP four-disulfide core domain 16                                             |
|                                                 | Prei4         | NM_028802    | 3.500 | 3.843 | glycerophosphocholine phosphodiesterase GDE1 homolog ( <i>S. cerevisiae</i> ) |
|                                                 | AK129341      | NM_001045524 | 3.068 | 2.257 | cDNA sequence AK129341                                                        |
|                                                 | Sult5a1       | NM_020564    | 2.909 | 3.912 | sulfotransferase family 5A, member 1                                          |
|                                                 | Sbk1          | NM_145587    | 2.905 | 2.317 | SH3-binding kinase 1                                                          |
|                                                 | Sspo          | NM_173428    | 2.855 | 2.625 | SCO-spondin                                                                   |
|                                                 | Aatk          | NM_007377    | 2.762 | 3.062 | apoptosis-associated tyrosine kinase                                          |
|                                                 | Slc25a45      | NM_134154    | 2.568 | 2.633 | solute carrier family 25, member 45                                           |
|                                                 | Gstt3         | NM_133994    | 2.545 | 2.160 | glutathione S-transferase, theta 3                                            |



---

|               |              |       |       |                                                                   |
|---------------|--------------|-------|-------|-------------------------------------------------------------------|
| Synpo         | NM_177340    | 2.484 | 3.292 | synaptopodin                                                      |
| Papss2        | NM_011864    | 2.427 | 2.053 | 3'-phosphoadenosine 5'-phosphosulfate synthase 2                  |
| Pdp2          | NM_001024606 | 2.349 | 2.312 | pyruvate dehydrogenase phosphatase catalytic subunit 2            |
| Anks1         | NM_181413    | 2.336 | 2.337 | ankyrin repeat and SAM domain containing 1                        |
| Fam107b       | NM_025626    | 2.251 | 2.028 | family with sequence similarity 107, member B                     |
| D230025D16Rik | NM_145604    | 2.210 | 1.704 | RIKEN cDNA D230025D16 gene                                        |
| Stx1a         | NM_016801    | 2.175 | 1.967 | syntaxin 1A (brain)                                               |
| Lrrc8d        | NM_178701    | 2.140 | 1.562 | leucine rich repeat containing 8D                                 |
| 1700067K01Rik | NM_183097    | 2.135 | 1.851 | RIKEN cDNA 1700067K01 gene                                        |
| Lims2         | NM_144862    | 2.103 | 2.303 | LIM and senescent cell antigen like domains 2                     |
| Cpne2         | NM_153507    | 2.089 | 1.828 | copine II                                                         |
| Stim2         | NM_001081103 | 2.087 | 2.157 | stromal interaction molecule 2                                    |
| Fndc5         | NM_027402    | 2.073 | 2.038 | fibronectin type III domain containing 5                          |
| H13           | NM_010376    | 2.072 | 1.913 | histocompatibility 13                                             |
| Tle6          | NM_053254    | 2.003 | 1.997 | transducin-like enhancer of split 6, homolog of Drosophila E(spl) |
| Tlcd2         | NM_027249    | 1.892 | 1.774 | TLC domain containing 2                                           |
| Letm1         | NM_019694    | 1.886 | 1.906 | leucine zipper-EF-hand containing transmembrane protein 1         |
| Gorasp1       | NM_028976    | 1.856 | 2.022 | golgi reassembly stacking protein 1                               |
| Trp53inp2     | NM_178111    | 1.852 | 1.934 | transformation related protein 53 inducible nuclear protein 2     |
| Abca3         | NM_013855    | 1.842 | 1.630 | ATP-binding cassette, sub-family A (ABC1), member 3               |
| BC013529      | NM_145418    | 1.836 | 1.693 | cDNA sequence BC013529                                            |
| Pnpla2        | NM_025802    | 1.830 | 1.972 | patatin-like phospholipase domain containing 2                    |
| Mapk6         | NM_027418    | 1.811 | 1.648 | mitogen-activated protein kinase 6                                |
| G3bp2         | NM_011816    | 1.734 | 1.495 | GTPase activating protein (SH3 domain) binding protein 2          |
| Wfikkn1       | NM_001100454 | 1.726 | 2.367 | WAP, FS, Ig, KU, and NTR-containing protein 1                     |
| Serpina6      | NM_007618    | 1.725 | 1.781 | serine (or cysteine) peptidase inhibitor, clade A, member 6       |
| Mtmr1         | NM_016985    | 1.720 | 1.398 | myotubularin related protein 1                                    |
| Pnpla5        | NM_029427    | 1.720 | 1.317 | patatin-like phospholipase domain containing 5                    |
| Rtn4ip1       | NM_130892    | 1.716 | 1.717 | reticulon 4 interacting protein 1                                 |
| Nadk          | NM_138671    | 1.703 | 1.409 | NAD kinase                                                        |

---

\* based on T<sub>3</sub> treated values

\*\*  $p \geq 0.05$

Table S3. Repressed genes in euthyroid mice ( $\leq 1.7$  fold\*,  $p < 0.05$ )

| Category                                        | GeneName | Accession No. | Fold change |         | Gene coded Protein                                                                      |
|-------------------------------------------------|----------|---------------|-------------|---------|-----------------------------------------------------------------------------------------|
|                                                 |          |               | T3          | GC-1    |                                                                                         |
| <b>Fat and cholesterol metabolism</b>           | Adh4     | NM_011996     | -2.426      | -2.030  | alcohol dehydrogenase 4 (class II), pi polypeptide                                      |
|                                                 | Adh1     | NM_007409     | -1.792      | -1.744  | alcohol dehydrogenase 1 (class I)                                                       |
| <b>Lipid metabolism</b>                         | Hsd17b6  | NM_013786     | -4.019      | -5.171  | hydroxysteroid (17-beta) dehydrogenase 6                                                |
| <b>Lipid transport</b>                          | Abca8a   | NM_153145     | -4.854      | -5.375  | ATP-binding cassette, sub-family A (ABC1), member 8a                                    |
|                                                 | Apo17a   | NM_029419     | -2.502      | -2.662  | apolipoprotein L 7a                                                                     |
|                                                 | Abca9    | NM_147220     | -2.349      | -2.437  | ATP-binding cassette, sub-family A (ABC1), member 9                                     |
|                                                 | Slco2a1  | NM_033314     | -1.850      | -2.211  | solute carrier organic anion transporter family, member 2a1                             |
| <b>Glucose metabolism</b>                       | Ppp1r3c  | NM_016854     | -7.602      | -10.687 | protein phosphatase 1, regulatory (inhibitor) subunit 3C                                |
|                                                 | Stbd1    | NM_175096     | -2.710      | -1.906  | starch binding domain 1                                                                 |
| <b>Amino acid metabolism</b>                    | Slc17a8  | NM_182959     | -3.155      | -3.027  | solute carrier family 17 (sodium-dependent inorganic phosphate cotransporter), member 8 |
|                                                 | Chdh     | NM_175343     | -1.837      | -1.733  | choline dehydrogenase                                                                   |
| <b>Bile secretion</b>                           | Aqp8     | NM_007474     | -2.282      | -2.646  | aquaporin 8                                                                             |
| <b>Nucleotide metabolism</b>                    | Nr1i3    | NM_009803     | -3.095      | -2.265  | nuclear receptor subfamily 1, group I, member 3                                         |
|                                                 | Zfp707   | NM_001081065  | -2.240      | -1.949  | zinc finger protein 707                                                                 |
|                                                 | Rhou     | NM_133955     | -1.995      | -1.864  | ras homolog gene family, member U                                                       |
|                                                 | Fst      | NM_008046     | -1.731      | -1.847  | follistatin                                                                             |
| <b>Cell proliferation &amp; differentiation</b> | Ppl      | NM_008909     | -1.811      | -1.643  | periplakin                                                                              |
| <b>Signal transduction</b>                      | Sucnr1   | NM_032400     | -3.934      | -4.274  | succinate receptor 1                                                                    |
|                                                 | Igfbp1   | NM_008341     | -2.062      | -3.118  | insulin-like growth factor binding protein 1                                            |
|                                                 | Spsb4    | NM_145134     | -1.841      | -1.726  | splA/ryanodine receptor domain and SOCS box containing 4                                |
|                                                 | Arrdc4   | NM_025549     | -1.723      | -1.660  | arrestin domain containing 4                                                            |

---

|                                    |               |              |        |        |                                                                                                   |
|------------------------------------|---------------|--------------|--------|--------|---------------------------------------------------------------------------------------------------|
| <b>Hormone activity regulation</b> | Serpina7      | NM_177920    | -4.107 | -3.723 | serine (or cysteine) peptidase inhibitor, clade A (alpha-1 antiproteinase, antitrypsin), member 7 |
| <b>Others</b>                      | Agxt2l1       | NM_001163587 | -4.817 | -5.035 | alanine-glyoxylate aminotransferase 2-like 1                                                      |
|                                    | Gm4952        | NM_001167907 | -4.011 | -4.257 | predicted gene 4952                                                                               |
|                                    | AC101743.4    | NM_001167907 | -3.734 | -3.332 | predicted gene 4956                                                                               |
|                                    | Cyp2c44       | NM_001167905 | -2.972 | -3.196 | cytochrome P450, family 2, subfamily c, polypeptide 44                                            |
|                                    | AU018778      | NM_144930    | -2.628 | -3.307 | carboxylesterase 1F                                                                               |
|                                    | Susd1         | NM_001163288 | -2.181 | -1.901 | sushi domain containing 1                                                                         |
|                                    | 1300014I06Rik | NM_025831    | -2.164 | -1.986 | RIKEN cDNA 1300014I06 gene                                                                        |
|                                    | Abcc3         | NM_029600    | -2.089 | -2.005 | ATP-binding cassette, sub-family C (CFTR/MRP), member 3                                           |
|                                    | Ces1          | NM_021456    | -1.948 | -2.337 | carboxylesterase 1G                                                                               |
|                                    | Lrrc3         | NM_145152    | -1.948 | -2.066 | leucine rich repeat containing 3                                                                  |
|                                    | Cyp2c55       | NM_001167905 | -1.946 | -2.724 | cytochrome P450, family 2, subfamily c, polypeptide 55                                            |
|                                    | Upb1          | NM_133995    | -1.822 | -1.450 | ureidopropionase, beta                                                                            |
|                                    | Nqo2          | NM_028089    | -1.817 | -1.738 | NAD(P)H dehydrogenase, quinone 2                                                                  |
|                                    | Fbxo21        | NM_145564    | -1.811 | -1.729 | F-box protein 21                                                                                  |
|                                    | Inhbc         | NM_010565    | -1.804 | -1.604 | inhibin beta-C                                                                                    |
|                                    | Slc25a37      | NM_026331    | -1.775 | -1.511 | solute carrier family 25, member 37                                                               |
|                                    | Prss8         | NM_133351    | -1.766 | -1.807 | protease, serine, 8 (prostasin)                                                                   |
|                                    | Fam176a       | NM_145570    | -1.699 | -1.153 | family with sequence similarity 176, member A                                                     |

---

\* based on T<sub>3</sub> treated values

Table S4. Induced genes in hypothyroid mice ( $\geq 1.7$  fold\*,  $p < 0.05$ )

| Category                              | Gene Symbol | Accession No. | Fold Change |                            | Gene coded Protein                                     |
|---------------------------------------|-------------|---------------|-------------|----------------------------|--------------------------------------------------------|
|                                       |             |               | T3          | GC-1                       |                                                        |
| <b>Fat and cholesterol metabolism</b> | Cyp17a1     | NM_007809     | 15.802      | 12.367                     | cytochrome P450, family 17, subfamily a, polypeptide 1 |
|                                       | Mgll        | NM_011844     | 3.805       | 4.047                      | monoglyceride lipase                                   |
|                                       | Acot11      | NM_025590     | 3.276       | 4.329                      | acyl-CoA thioesterase 11                               |
|                                       | Mup4        | NM_008648     | 2.938       | 3.204                      | major urinary protein 4                                |
|                                       | Cyp7b1      | NM_007825     | 2.886       | 2.888                      | cytochrome P450, family 7, subfamily b, polypeptide 1  |
|                                       | Stat5a      | NM_011488     | 2.753       | 2.760                      | signal transducer and activator of transcription 5A    |
|                                       | Gne         | NM_015828     | 2.655       | 2.635                      | glucosamine                                            |
|                                       | Ang         | NM_007447     | 2.486       | 2.599                      | angiogenin, ribonuclease, RNase A family, 5            |
|                                       | Pnpla2      | NM_025802     | 2.336       | 2.229                      | patatin-like phospholipase domain containing 2         |
|                                       | Sqle        | NM_009270     | 2.288       | 1.726                      | squalene epoxidase                                     |
|                                       | Ppard       | NM_011145     | 2.257       | 2.011                      | peroxisome proliferator activator receptor delta       |
|                                       | Cyp27a1     | NM_024264     | 2.254       | 2.465                      | cytochrome P450, family 27, subfamily a, polypeptide 1 |
|                                       | Aspg        | NM_001081169  | 2.146       | 1.837                      | asparaginase homolog ( <i>S. cerevisiae</i> )          |
|                                       | Daglb       | NM_144915     | 2.030       | 1.901                      | diacylglycerol lipase, beta                            |
|                                       | Gm4738      | NM_144511     | 2.014       | 2.634                      | carboxylesterase 3B                                    |
|                                       | Hsd17b2     | NM_008290     | 1.917       | 1.728                      | hydroxysteroid (17-beta) dehydrogenase 2               |
|                                       | Slc35c1     | NM_145832     | 1.871       | 1.289                      | solute carrier family 35, member C1                    |
|                                       | Bbs4        | NM_175325     | 1.841       | 1.460                      | Bardet-Biedl syndrome 4 (human)                        |
|                                       | Vav2        | NM_009500     | 1.832       | 2.203                      | vav 2 oncogene                                         |
|                                       | Apof        | NM_133997     | 1.786       | 1.912                      | apolipoprotein F                                       |
| 2010111I01Rik                         | NM_028079   | 1.779         | 1.761       | RIKEN cDNA 2010111I01 gene |                                                        |
| <b>Lipid metabolism</b>               | Abca3       | NM_013855     | 2.580       | 3.613                      | ATP-binding cassette, sub-family A (ABC1), member 3    |
|                                       | Abcd3       | NM_008991     | 1.992       | 2.418                      | ATP-binding cassette, sub-family D (ALD), member 3     |
| <b>Glucose metabolism</b>             | Gpd2        | NM_010274     | 4.673       | 5.172                      | glycerol phosphate dehydrogenase 2, mitochondrial      |
|                                       | Slc3a1      | NM_009205     | 3.129       | 2.070                      | solute carrier family 3, member 1                      |
|                                       | Igfbp4      | NM_010517     | 2.261       | 1.977                      | insulin-like growth factor binding protein 4           |
|                                       | Trak2       | NM_172406     | 2.068       | 2.075                      | trafficking protein, kinesin binding 2                 |
|                                       | St3gal3     | NM_009176     | 2.001       | 2.018                      | ST3 beta-galactoside alpha-2,3-sialyltransferase 3     |
|                                       | Hs6st1      | NM_015818     | 1.862       | 1.558                      | heparan sulfate 6-O-sulfotransferase 1                 |

|                                                 |          |              |       |       |                                                                                 |
|-------------------------------------------------|----------|--------------|-------|-------|---------------------------------------------------------------------------------|
| <b>Acetyl-CoA metabolism</b>                    | Nudt7    | NM_024446    | 5.097 | 5.028 | nudix (nucleoside diphosphate linked moiety X)-type motif 7                     |
|                                                 | Idh3a    | NM_029573    | 3.327 | 4.333 | isocitrate dehydrogenase 3 (NAD+) alpha                                         |
|                                                 | Foxred1  | NM_172291    | 1.913 | 1.468 | FAD-dependent oxidoreductase domain containing 1                                |
| <b>Amino acid metabolism</b>                    | Slc6a12  | NM_133661    | 3.186 | 3.189 | solute carrier family 6 (neurotransmitter transporter, betaine/GABA), member 12 |
|                                                 | Prodh    | NM_011172    | 2.879 | 3.014 | proline dehydrogenase                                                           |
|                                                 | Prhoxnb  | NM_001039678 | 2.289 | 2.007 | parahox cluster neighbor                                                        |
| <b>Nucleotide metabolism</b>                    | Upp2     | NM_029692    | 3.615 | 7.848 | uridine phosphorylase 2                                                         |
|                                                 | Hr       | NM_021877    | 2.827 | 1.848 | hairless                                                                        |
|                                                 | Rcl1     | NM_021525    | 2.768 | 2.606 | RNA terminal phosphate cyclase-like 1                                           |
|                                                 | Ung      | NM_011677    | 2.581 | 2.069 | uracil DNA glycosylase                                                          |
|                                                 | Adarb1   | NM_130895    | 1.701 | 2.352 | adenosine deaminase, RNA-specific, B1                                           |
| <b>Bile secretion</b>                           | Pdp2     | NM_001024606 | 4.072 | 4.834 | pyruvate dehydrogenase phosphatase catalytic subunit 2                          |
|                                                 | Slc22a7  | NM_144856    | 3.827 | 6.142 | solute carrier family 22 (organic anion transporter), member 7                  |
| <b>Cell proliferation &amp; differentiation</b> | Cebpb    | NM_009883    | 3.757 | 3.596 | CCAAT/enhancer binding protein (C/EBP), beta                                    |
|                                                 | Nrp1     | NM_008737    | 3.028 | 2.164 | neuropilin 1                                                                    |
|                                                 | Csrp3    | NM_013808    | 2.694 | 2.208 | cysteine and glycine-rich protein 3                                             |
|                                                 | Bcl3     | NM_033601    | 2.658 | 2.743 | B-cell leukemia/lymphoma 3                                                      |
|                                                 | Hopx     | NM_175606    | 2.527 | 2.154 | HOP homeobox                                                                    |
|                                                 | Mmd      | NM_026178    | 2.513 | 3.248 | monocyte to macrophage differentiation-associated                               |
|                                                 | Klf13    | NM_021366    | 2.019 | 2.833 | Kruppel-like factor 13                                                          |
|                                                 | Fgf21    | NM_020013    | 2.014 | 1.885 | fibroblast growth factor 21                                                     |
|                                                 | Il15ra   | NM_133836    | 1.706 | 1.617 | interleukin 15 receptor, alpha chain                                            |
| <b>Signal transduction</b>                      | Arhgap26 | NM_175164    | 2.237 | 2.881 | Rho GTPase activating protein 26                                                |
|                                                 | Gng10    | NM_025277    | 2.036 | 2.043 | guanine nucleotide binding protein (G protein), gamma 10                        |
|                                                 | Sdc4     | NM_011521    | 1.914 | 1.902 | syndecan 4                                                                      |
|                                                 | Gpr97    | NM_173036    | 1.712 | 1.390 | G protein-coupled receptor 97                                                   |

|                                    |               |              |        |        |                                                                                                                                    |
|------------------------------------|---------------|--------------|--------|--------|------------------------------------------------------------------------------------------------------------------------------------|
| <b>Hormone activity regulation</b> | Dio1          | NM_007860    | 31.720 | 30.805 | deiodinase, iodothyronine, type I                                                                                                  |
|                                    | Thrsp         | NM_009381    | 10.132 | 12.798 | thyroid hormone responsive SPOT14 homolog (Rattus)                                                                                 |
|                                    | Snx10         | NM_028035    | 2.260  | 2.461  | sorting nexin 10                                                                                                                   |
| <b>Others</b>                      | Crybb3        | NM_021352    | 10.737 | 4.485  | crystallin, beta B3                                                                                                                |
|                                    | Slc25a45      | NM_134154    | 10.445 | 10.724 | solute carrier family 25, member 45<br>glycerophosphocholine phosphodiesterase GDE1 homolog (S. cerevisiae)                        |
|                                    | Prei4         | NM_028802    | 9.126  | 10.016 | cerevisiae)                                                                                                                        |
|                                    | Sbk1          | NM_145587    | 6.060  | 8.017  | SH3-binding kinase 1                                                                                                               |
|                                    | Mup6          | NM_001081285 | 5.430  | 5.842  | major urinary protein 6                                                                                                            |
|                                    | Osgin1        | NM_027950    | 5.397  | 5.872  | oxidative stress induced growth inhibitor 1                                                                                        |
|                                    | 9030619P08Rik | NM_001039720 | 5.387  | 7.500  | RIKEN cDNA 9030619P08 gene                                                                                                         |
|                                    | Rab34         | NM_033475    | 5.249  | 4.016  | RAB34, member of RAS oncogene family                                                                                               |
|                                    | Trp53inp2     | NM_178111    | 5.244  | 4.379  | transformation related protein 53 inducible nuclear protein 2                                                                      |
|                                    | Rarres1       | NM_001164763 | 4.980  | 5.011  | retinoic acid receptor responder (tazarotene induced) 1                                                                            |
|                                    | Tlcd2         | NM_027249    | 4.774  | 4.839  | TLC domain containing 2                                                                                                            |
|                                    | Cela2a        | NM_007919    | 4.642  | 6.771  | chymotrypsin-like elastase family, member 2A                                                                                       |
|                                    | Wfdc12        | NM_138684    | 4.553  | 2.613  | WAP four-disulfide core domain 12                                                                                                  |
|                                    | Ankhd1        | NM_201256    | 4.438  | 2.003  | ankyrin repeat and KH domain containing 1<br>proteoglycan 4 (megakaryocyte stimulating factor, articular superficial zone protein) |
|                                    | Prg4          | NM_021400    | 4.307  | 2.346  | superficial zone protein)                                                                                                          |
|                                    | Aatk          | NM_007377    | 3.526  | 3.807  | apoptosis-associated tyrosine kinase                                                                                               |
|                                    | Synpo         | NM_177340    | 3.315  | 2.593  | synaptopodin                                                                                                                       |
|                                    | Slc25a30      | NM_026232    | 3.115  | 3.333  | solute carrier family 25, member 30                                                                                                |
|                                    | Pfkfb4        | NM_173019    | 3.015  | 1.758  | 6-phosphofructo-2-kinase/fructose-2,6-biphosphatase 4                                                                              |
|                                    | Tsku          | NM_001168541 | 2.990  | 4.951  | tsukushin                                                                                                                          |
|                                    | Ctsc          | NM_009982    | 2.777  | 2.605  | cathepsin C                                                                                                                        |
|                                    | Lims2         | NM_144862    | 2.763  | 3.308  | LIM and senescent cell antigen like domains 2                                                                                      |
|                                    | Cyp2c70       | NM_145499    | 2.547  | 3.420  | cytochrome P450, family 2, subfamily c, polypeptide 70                                                                             |
|                                    | D230025D16Rik | NM_145604    | 2.458  | 2.884  | RIKEN cDNA D230025D16 gene                                                                                                         |
|                                    | Epb4.1        | NM_183428    | 2.440  | 2.228  | erythrocyte protein band 4.1                                                                                                       |
|                                    | Coq10a        | NM_001081040 | 2.409  | 2.327  | coenzyme Q10 homolog A (yeast)                                                                                                     |
|                                    | Lrrc8d        | NM_178701    | 2.383  | 2.165  | leucine rich repeat containing 8D                                                                                                  |
|                                    | Ostb          | NM_178933    | 2.371  | 2.163  | organic solute transporter beta                                                                                                    |

---

|               |              |       |       |                                                                     |
|---------------|--------------|-------|-------|---------------------------------------------------------------------|
| Nelf          | NM_020276    | 2.352 | 2.807 | nasal embryonic LHRH factor                                         |
| Serpina3g     | NM_009251    | 2.344 | 2.472 | serine (or cysteine) peptidase inhibitor, clade A, member 3G        |
| Smagp         | NM_174992    | 2.339 | 2.378 | small cell adhesion glycoprotein                                    |
| Letm1         | NM_019694    | 2.310 | 2.153 | leucine zipper-EF-hand containing transmembrane protein 1           |
| Klhl25        | NM_182782    | 2.305 | 1.897 | kelch-like 25 (Drosophila)                                          |
| Uck1          | NM_011675    | 2.299 | 3.030 | uridine-cytidine kinase 1                                           |
| Ulk1          | NM_009469    | 2.220 | 2.378 | Unc-51 like kinase 1 (C. elegans)                                   |
| N4bp211       | NM_133898    | 2.164 | 3.118 | NEDD4 binding protein 2-like 1                                      |
| Npr2          | NM_173788    | 2.158 | 2.897 | natriuretic peptide receptor 2                                      |
| Sult1d1       | NM_016771    | 2.137 | 2.319 | sulfotransferase family 1D, member 1                                |
| Tomm40l       | NM_001037170 | 2.131 | 2.776 | translocase of outer mitochondrial membrane 40 homolog-like (yeast) |
| Dnaja3        | NM_023646    | 2.109 | 1.659 | DnaJ (Hsp40) homolog, subfamily A, member 3                         |
| Cpsf4l        | NM_029794    | 2.099 | 2.150 | cleavage and polyadenylation specific factor 4-like                 |
| Tlcd1         | NM_026708    | 2.079 | 2.134 | TLC domain containing 1                                             |
| Rab43         | NM_133717    | 2.066 | 2.205 | RAB43, member RAS oncogene family                                   |
| Slc46a3       | NM_027872    | 2.056 | 2.295 | solute carrier family 46, member 3                                  |
| Grhpr         | NM_080289    | 2.027 | 1.831 | glyoxylate reductase/hydroxypyruvate reductase                      |
| 1700019G17Rik | NM_029331    | 1.999 | 1.712 | RIKEN cDNA 1700019G17 gene                                          |
| Tapt1         | NM_173764    | 1.957 | 1.789 | transmembrane anterior posterior transformation 1                   |
| Ciapin1       | NM_134141    | 1.945 | 1.949 | cytokine induced apoptosis inhibitor 1                              |
| H13           | NM_010376    | 1.932 | 2.047 | histocompatibility 13                                               |
| Nudt18        | NM_024815    | 1.929 | 1.844 | nudix (nucleoside diphosphate linked moiety X)-type motif 18        |
| Mtap7d1       | NM_144941    | 1.926 | 1.625 | microtubule-associated protein 7 domain containing 1                |
| Wipi1         | NM_145940    | 1.914 | 1.690 | WD repeat domain, phosphoinositide interacting 1                    |
| Decr2         | NM_011933    | 1.882 | 1.744 | 2-4-dienoyl-Coenzyme A reductase 2, peroxisomal                     |
| Fam107b       | NM_025626    | 1.877 | 2.436 | family with sequence similarity 107, member B                       |
| Anks1         | NM_181413    | 1.856 | 1.707 | ankyrin repeat and SAM domain containing 1                          |
| Mapk6         | NM_027418    | 1.841 | 1.765 | mitogen-activated protein kinase 6                                  |
| Dexi          | NM_021428    | 1.800 | 2.231 | dexamethasone-induced transcript                                    |
| Tubb6         | NM_026473    | 1.778 | 1.733 | tubulin, beta 6                                                     |
| Dynlrb1       | NM_025947    | 1.776 | 1.876 | dynein light chain roadblock-type 1                                 |
| Slc25a42      | NM_001007570 | 1.775 | 1.945 | solute carrier family 25, member 42                                 |
| Cobl          | NM_172496    | 1.770 | 1.785 | cordón-bleu                                                         |
| Egfr          | NM_207655    | 1.752 | 0.958 | epidermal growth factor receptor                                    |

---

---

Tor1a

NM\_144884

1.707

1.728

torsin family 1, member A (torsin A)

---

\* based on T<sub>3</sub> treated values



Table S5. Repressed genes in hypothyroid mice ( $\leq 1.7$  fold\*,  $p < 0.05$ )

| Category                              | Gene Symbol | Accession No. | Fold Change |         | Gene coded Protein                                               |
|---------------------------------------|-------------|---------------|-------------|---------|------------------------------------------------------------------|
|                                       |             |               | T3          | GC-1    |                                                                  |
| <b>Fat and cholesterol metabolism</b> | Acot1       | NM_012006     | -15.575     | -14.603 | acyl-CoA thioesterase 1                                          |
|                                       | Adh4        | NM_011996     | -3.921      | -2.508  | alcohol dehydrogenase 4 (class II), pi polypeptide               |
|                                       | Acot4       | NM_134247     | -3.072      | -2.335  | acyl-CoA thioesterase 4                                          |
|                                       | Pparg       | NM_011146     | -2.357      | -2.138  | peroxisome proliferator activated receptor gamma                 |
|                                       | Cyp4a12b    | NM_172306     | -2.205      | -2.027  | cytochrome P450, family 4, subfamily a, polypeptide 12B          |
|                                       | Hpgd        | NM_008278     | -2.110      | -1.376  | hydroxyprostaglandin dehydrogenase 15 (NAD)                      |
|                                       | Cyp1a2      | NM_009993     | -2.018      | -1.963  | cytochrome P450, family 1, subfamily a, polypeptide 2            |
|                                       | Lipa        | NM_021460     | -1.831      | -1.342  | lysosomal acid lipase A                                          |
|                                       | Acadm       | NM_007382     | -1.772      | -1.840  | acyl-Coenzyme A dehydrogenase, medium chain                      |
| <b>Glucose metabolism</b>             | Ppp1r3c     | NM_016854     | -9.027      | -17.838 | protein phosphatase 1, regulatory (inhibitor) subunit 3C         |
|                                       | Entpd5      | NM_007647     | -3.171      | -2.579  | ectonucleoside triphosphate diphosphohydrolase 5                 |
|                                       | St6gal1     | NM_145933     | -2.475      | -2.598  | beta galactoside alpha 2,6 sialyltransferase 1                   |
| <b>Amino acid metabolism</b>          | Cth         | NM_145953     | -4.062      | -2.252  | cystathionase (cystathionine gamma-lyase)                        |
|                                       | Htati2      | NM_016865     | -2.476      | -2.406  | HIV-1 tat interactive protein 2, homolog (human)                 |
|                                       | Dct         | NM_010024     | -2.070      | -1.460  | dopachrome tautomerase                                           |
|                                       | Chdh        | NM_175343     | -1.954      | -1.778  | choline dehydrogenase                                            |
|                                       | Gclm        | NM_008129     | -1.874      | -1.607  | glutamate-cysteine ligase, modifier subunit                      |
|                                       | Hagh        | NM_024284     | -1.858      | -1.464  | hydroxyacyl glutathione hydrolase                                |
|                                       | Thns12      | NM_178413     | -1.757      | -2.035  | threonine synthase-like 2 (bacterial)                            |
| <b>Nucleotide metabolism</b>          | Mcm10       | NM_027290     | -3.514      | -2.648  | minichromosome maintenance deficient 10 ( <i>S. cerevisiae</i> ) |
|                                       | Cebpe       | NM_207131     | -2.874      | -2.895  | CCAAT/enhancer binding protein (C/EBP), epsilon                  |
|                                       | Creg1       | NM_011804     | -2.517      | -2.360  | cellular repressor of E1A-stimulated genes 1                     |
|                                       | Zfp707      | NM_001081065  | -2.474      | -3.148  | zinc finger protein 707                                          |
|                                       | Zfp1        | NM_009569     | -2.465      | -1.949  | zinc finger protein, multitype 1                                 |
|                                       | Cdkn1c      | NM_009876     | -2.427      | -2.618  | cyclin-dependent kinase inhibitor 1C (P57)                       |
|                                       | Tcea3       | NM_011542     | -2.322      | -1.374  | transcription elongation factor A (SII), 3                       |
|                                       | Nfyb        | NM_010914     | -2.212      | -1.673  | nuclear transcription factor-Y beta                              |
|                                       | Tsc22d3     | NM_010286     | -2.153      | -2.099  | TSC22 domain family, member 3                                    |

|                                                 |         |              |        |        |                                                                                         |
|-------------------------------------------------|---------|--------------|--------|--------|-----------------------------------------------------------------------------------------|
|                                                 | Rfx6    | NM_001085374 | -1.996 | -1.891 | regulatory factor X, 6                                                                  |
|                                                 | Clpx    | NM_011802    | -1.971 | -3.518 | caseinolytic peptidase X (E.coli)                                                       |
|                                                 | Adssl1  | NM_007421    | -1.924 | -1.963 | adenylosuccinate synthetase like 1                                                      |
|                                                 | Zfp3611 | NM_007564    | -1.765 | -1.643 | zinc finger protein 36, C3H type-like 1                                                 |
|                                                 | Esrp2   | NM_176838    | -1.705 | -1.624 | epithelial splicing regulatory protein 2                                                |
| <b>Lipid transport</b>                          | Apol7a  | NM_029419    | -4.143 | -2.916 | apolipoprotein L 7a                                                                     |
|                                                 | Osbp13  | NM_027881    | -2.679 | -2.451 | oxysterol binding protein-like 3                                                        |
|                                                 | Slco2a1 | NM_033314    | -2.282 | -2.303 | solute carrier organic anion transporter family, member 2a1                             |
| <b>Amino acid transport</b>                     | Slc1a2  | NM_001077515 | -2.280 | -1.646 | solute carrier family 1 (glial high affinity glutamate transporter), member 2           |
|                                                 | Slc17a8 | NM_182959    | -1.960 | -2.071 | solute carrier family 17 (sodium-dependent inorganic phosphate cotransporter), member 8 |
|                                                 | Slc44a1 | NM_133891    | -1.923 | -1.866 | solute carrier family 44, member 1                                                      |
| <b>Bile secretion</b>                           | Abcc3   | NM_029600    | -2.297 | -1.943 | ATP-binding cassette, sub-family C (CFTR/MRP), member 3                                 |
|                                                 | Abcc2   | NM_013806    | -1.892 | -1.834 | ATP-binding cassette, sub-family C (CFTR/MRP), member 2                                 |
|                                                 | Aqp4    | NM_009700    | -1.768 | -1.784 | aquaporin 4                                                                             |
| <b>Cell proliferation &amp; differentiation</b> | Gas7    | NM_008088    | -5.185 | -4.703 | growth arrest specific 7                                                                |
|                                                 | Prok1   | NM_029562    | -2.743 | -2.113 | prokineticin 1                                                                          |
|                                                 | Olig1   | NM_016968    | -2.626 | -2.793 | oligodendrocyte transcription factor 1                                                  |
|                                                 | Btg1    | NM_007569    | -2.614 | -2.557 | B-cell translocation gene 1, anti-proliferative                                         |
|                                                 | Ildr2   | NM_001164528 | -2.182 | -2.189 | immunoglobulin-like domain containing receptor 2                                        |
|                                                 | Dsp     | NM_023842    | -2.027 | -1.726 | desmoplakin                                                                             |
|                                                 | Casp6   | NM_009811    | -2.011 | -1.864 | caspase 6                                                                               |
|                                                 | Sdc1    | NM_011519    | -1.805 | -1.849 | syndecan 1                                                                              |
|                                                 | Casp9   | NM_015733    | -1.751 | -1.372 | caspase 9                                                                               |
| <b>Signal transduction</b>                      | Sucnr1  | NM_032400    | -4.268 | -3.173 | succinate receptor 1                                                                    |
|                                                 | Plxna2  | NM_008882    | -2.335 | -2.269 | plexin A2                                                                               |

|                                    |          |              |         |        |                                                                                                   |
|------------------------------------|----------|--------------|---------|--------|---------------------------------------------------------------------------------------------------|
|                                    | Arrdc4   | NM_025549    | -1.811  | -2.177 | arrestin domain containing 4                                                                      |
|                                    | Rab32    | NM_026405    | -1.733  | -1.605 | RAB32, member RAS oncogene family                                                                 |
|                                    | Wwc1     | NM_170779    | -1.696  | -1.426 | WW, C2 and coiled-coil domain containing 1                                                        |
| <b>Hormone activity regulation</b> | Serpina7 | NM_177920    | -11.197 | -8.046 | serine (or cysteine) peptidase inhibitor, clade A (alpha-1 antiproteinase, antitrypsin), member 7 |
| <b>Other</b>                       | Cbr3     | NM_173047    | -9.004  | -7.328 | carbonyl reductase 3                                                                              |
|                                    | Agxt211  | NM_027907    | -5.337  | -3.874 | alanine-glyoxylate aminotransferase 2-like 1                                                      |
|                                    | Gm4952   | NM_001167907 | -4.528  | -4.218 | predicted gene 4952                                                                               |
|                                    | Abca8a   | NM_153145    | -4.122  | -3.426 | ATP-binding cassette, sub-family A (ABC1), member 8a                                              |
|                                    | Mfsd7c   | NM_145447    | -3.188  | -2.986 | major facilitator superfamily domain containing 7C                                                |
|                                    | Car14    | NM_011797    | -3.064  | -3.144 | carbonic anhydrase 14                                                                             |
|                                    | Oat      | NM_016978    | -2.918  | -2.417 | ornithine aminotransferase                                                                        |
|                                    | Spon2    | NM_133903    | -2.837  | -3.932 | spondin 2, extracellular matrix protein                                                           |
|                                    | Ndrp1    | NM_008681    | -2.792  | -2.632 | N-myc downstream regulated gene 1                                                                 |
|                                    | Fbxo21   | NM_145564    | -2.735  | -2.469 | F-box protein 21                                                                                  |
|                                    | Fam129b  | NM_146119    | -2.689  | -3.495 | family with sequence similarity 129, member B                                                     |
|                                    | Eps8l2   | NM_133191    | -2.651  | -2.125 | EPS8-like 2                                                                                       |
|                                    | Susd1    | NM_001163288 | -2.530  | -2.745 | sushi domain containing 1                                                                         |
|                                    | Ces1b    | NM_001081372 | -2.499  | -1.990 | carboxylesterase 1B                                                                               |
|                                    | Fmo5     | NM_010232    | -2.468  | -2.129 | flavin containing monooxygenase 5                                                                 |
|                                    | Ppm1k    | NM_175523    | -2.389  | -1.819 | protein phosphatase 1K (PP2C domain containing)                                                   |
|                                    | Mgst3    | NM_025569    | -2.348  | -2.264 | microsomal glutathione S-transferase 3                                                            |
|                                    | Slc25a37 | NM_026331    | -2.341  | -2.355 | solute carrier family 25, member 37                                                               |
|                                    | Hectd2   | NM_172637    | -2.292  | -2.235 | HECT domain containing 2                                                                          |
|                                    | Nqo1     | NM_008706    | -2.275  | -2.194 | NAD(P)H dehydrogenase, quinone 1                                                                  |
|                                    | Pcp4l1   | NM_025557    | -2.274  | -2.173 | Purkinje cell protein 4-like 1                                                                    |
|                                    | Cyp2c44  | NM_001167905 | -2.262  | -2.223 | cytochrome P450, family 2, subfamily c, polypeptide 44                                            |
|                                    | Cyp2d26  | NM_029562    | -2.262  | -2.433 | cytochrome P450, family 2, subfamily d, polypeptide 26                                            |
|                                    | Arsa     | NM_009713    | -2.259  | -2.106 | arylsulfatase A                                                                                   |
|                                    | Gstm4    | NM_026764    | -2.170  | -1.656 | glutathione S-transferase, mu 4                                                                   |
|                                    | Syt1     | NM_009306    | -2.141  | -1.766 | synaptotagmin I                                                                                   |
|                                    | Sgk2     | NM_013731    | -2.125  | -1.845 | serum/glucocorticoid regulated kinase 2                                                           |

---

|               |              |        |        |                                                                                                      |
|---------------|--------------|--------|--------|------------------------------------------------------------------------------------------------------|
| 4933422H20Rik | NM_001033775 | -2.110 | -1.908 | RIKEN cDNA 4933422H20 gene                                                                           |
| Acat3         | NM_153151    | -2.091 | -1.635 | acetyl-Coenzyme A acetyltransferase 3                                                                |
| Krt23         | NM_033373    | -2.088 | -1.861 | keratin 23                                                                                           |
| 1700037H04Rik | NM_026091    | -2.074 | -1.938 | RIKEN cDNA 1700037H04 gene                                                                           |
| Cpamd8        | NM_008646    | -2.066 | -1.681 | murinoglobulin 2                                                                                     |
| A230050P20Rik | NM_175687    | -2.009 | -2.286 | RIKEN cDNA A230050P20 gene                                                                           |
| Pnkd          | NM_019999    | -2.006 | -2.335 | paroxysmal nonkinesiogenic dyskinesia                                                                |
| Cmb1          | NM_181588    | -1.994 | -1.824 | carboxymethylenebutenolidase-like ( <i>Pseudomonas</i> )                                             |
| Lhpp          | NM_029609    | -1.992 | -2.200 | phospholysine phosphohistidine inorganic pyrophosphate phosphatase                                   |
| Spag4         | NM_139151    | -1.976 | -1.634 | sperm associated antigen 4                                                                           |
| Hyi           | NM_026601    | -1.966 | -2.155 | hydroxypyruvate isomerase homolog ( <i>E. coli</i> )                                                 |
| Odf3b         | NM_001013022 | -1.952 | -2.153 | outer dense fiber of sperm tails 3B                                                                  |
| Prss8         | NM_133351    | -1.937 | -1.760 | protease, serine, 8 (prostasin)                                                                      |
| Abcb6         | NM_023732    | -1.933 | -1.662 | ATP-binding cassette, sub-family B (MDR/TAP), member 6                                               |
| Comt1         | NM_007744    | -1.929 | -2.048 | catechol-O-methyltransferase                                                                         |
| Abca9         | NM_147220    | -1.896 | -1.742 | ATP-binding cassette, sub-family A (ABC1), member 9                                                  |
| Trp53inp1     | NM_021897    | -1.885 | -1.278 | transformation related protein 53 inducible nuclear protein 1                                        |
| Ireb2         | NM_022655    | -1.878 | -1.753 | iron responsive element binding protein 2                                                            |
| Daam1         | NM_172464    | -1.876 | -1.796 | dishevelled associated activator of morphogenesis 1                                                  |
| Pcbp4         | NM_021567    | -1.874 | -1.679 | poly(rC) binding protein 4                                                                           |
| Il17rb        | NM_019583    | -1.840 | -1.774 | interleukin 17 receptor B                                                                            |
| Slc35d2       | NM_001001321 | -1.835 | -1.723 | solute carrier family 35, member D2                                                                  |
| Tm4sf4        | NM_145539    | -1.805 | -2.202 | transmembrane 4 superfamily member 4                                                                 |
| Upb1          | NM_133995    | -1.801 | -1.800 | ureidopropionase, beta                                                                               |
| Gstm2         | NM_008183    | -1.801 | -1.557 | glutathione S-transferase, mu 2                                                                      |
| Blvrb         | NM_144923    | -1.791 | -1.507 | biliverdin reductase B (flavin reductase (NADPH))                                                    |
| Nt5dc2        | NM_027289    | -1.778 | -1.781 | 5'-nucleotidase domain containing 2                                                                  |
| Tmem51        | NM_145402    | -1.772 | -1.828 | transmembrane protein 51                                                                             |
| Slc35d1       | NM_177732    | -1.748 | -1.392 | solute carrier family 35 (UDP-glucuronic acid/UDP-N-acetylgalactosamine dual transporter), member D1 |
| Srxn1         | NM_029688    | -1.742 | -1.961 | sulfiredoxin 1 homolog ( <i>S. cerevisiae</i> )                                                      |
| Fam169b       | NM_001013811 | -1.739 | -1.423 | family with sequence similarity 169, member B                                                        |
| Mocs1         | NM_028464    | -1.703 | -1.559 | molybdenum cofactor synthesis 1                                                                      |
| Gstm6         | NM_008184    | -1.702 | -1.426 | glutathione S-transferase, mu 6                                                                      |

---

---

Lnx2

NM\_080795

-1.701

-1.996

ligand of numb-protein X 2

---

\* based on T<sub>3</sub> treated values

| Ligand         | Induced  | Suppressed |
|----------------|----------|------------|
| T <sub>3</sub> | 104 (42) | 10 (10)    |
| GC-1           | 70 (26)  | 5 (5)      |

**Table S6.** Number of genes regulated by T<sub>3</sub> and GC-1 in HepG2 (adjusted p-value  $\leq 0.05$ ). Numbers in parenthesis indicate the subset of genes regulated more than 1.7 fold.

Table S7. Induced Genes HepG2 ( $\geq 1.7$  fold\*,  $p \leq 0.05$ )

| Category                                    | Gene Symbol | Accession. No. | Fold Change    |         | Gene encoded Protein                                                                         |
|---------------------------------------------|-------------|----------------|----------------|---------|----------------------------------------------------------------------------------------------|
|                                             |             |                | T <sub>3</sub> | GC-1    |                                                                                              |
| Glucose metabolism                          | G6PC        | NM_000151      | 5.405          | 3.882   | Glucose-6-phosphatase, catalytic subunit                                                     |
|                                             | PCK1        | NM_002591      | 2.723          | 2.073   | Phosphoenolpyruvate carboxykinase 1 (PEPCK)                                                  |
|                                             | GBE1        | NM_000158      | 1.917          | 1.759   | Glucan (1, 4-alpha-), branching enzyme 1                                                     |
| Fat metabolism                              | ACSM2       | NM_001010845   | 3.260          | 2.865   | Acyl-CoA synthetase medium-chain family member 2                                             |
|                                             | CPT1A       | NM_001876      | 2.485          | 2.12    | Carnitine palmitoyltransferase 1A (liver) (isoform 1 )                                       |
|                                             | CYP4F3      | NM_000896      | 2.081          | 1.808   | Cytochrome P450, family 4, subfamily F, polypeptide 3                                        |
|                                             | ANGPTL4     | NM_139314      | 2.023          | 1.627   | Angiopoietin-like 4                                                                          |
| Bile acid/steroid metabolism                | NR1H4       | NM_005123      | 1.883          | 1.781   | Nuclear receptor subfamily 1, group H, member 4) (FXR)                                       |
|                                             | HSD17B2     | NM_002153      | 1.911          | 1.748   | Hydroxysteroid (17-beta) dehydrogenase 2                                                     |
| Amino acid metabolism/transport             | SLC16A6     | NM_004694      | 3.017          | 2.367   | Solute carrier family 16, member 6 (monocarboxylic acid transporter 7)                       |
|                                             | SLC1A2      | NM_004171      | 1.770          | 1.594   | Solute carrier family 1 (glial high affinity glutamate transporter), member 2                |
|                                             | HAL         | NM_002108      | 1.862          | 1.287** | Histidine ammonia- lyase                                                                     |
|                                             | ARG1        | NM_000045      | 1.701          | 1.443** | Arginase, liver                                                                              |
| Apoptosis                                   | TNFSF10     | NM_003810      | 2.917          | 2.380   | Tumor necrosis factor (ligand) superfamily, member 10                                        |
|                                             | GADD45B     | NM_015675      | 1.843          | 1.762   | Growth arrest and DNA-damage-inducible, beta                                                 |
| Protein phosphorylation/signal transduction | C8orf4      | NM_020130      | 2.228          | 2.081   | Chromosome 8 open reading frame 4                                                            |
|                                             | SGK         | NM_005627      | 2.128          | 2.190   | Serum/glucocorticoid regulated kinase                                                        |
|                                             | C10orf10    | NM_007021      | 2.007          | 1.952   | Chromosome 10 open reading frame 10                                                          |
|                                             | TNS1        | NM_022648      | 1.913          | 1.565** | Tensin 1                                                                                     |
| Blood coagulation                           | FGA         | NM_000508      | 2.162          | 2.040   | Fibrinogen alpha chain (FGA), transcript variant alpha-E                                     |
|                                             | SERPINE1    | NM_000602      | 1.923          | 1.484   | Serpin peptidase inhibitor, clade E(nexin, plasminogen activator inhibitor type 1), member 1 |
|                                             | FGB         | NM_005141      | 1.741          | 1.654   | Fibrinogen beta chain                                                                        |
| Immune system /complement activation        | C8B         | NM_000066      | 2.312          | 2.062   | Complement component 8, beta polypeptide                                                     |
|                                             | CD14        | NM_000591      | 2.251          | 2.071   | CD14 molecule                                                                                |
|                                             | C8A         | NM_000562      | 1.820          | 1.683   | Complement component 8, alpha polypeptide                                                    |
|                                             | ISG20       | NM_002201      | 1.803          | 1.633   | Interferon stimulated exonuclease gene 20kDa                                                 |
|                                             | EBI3        | NM_005755      | 1.709          | 1.546   | Epstein-Barr virus induced gene 3                                                            |
| Xenobiotics metabolism by P450              | GSTA1       | NM_000846      | 3.112          | 2.632   | Glutathione S-transferase A1                                                                 |
|                                             | UGT2B4      | NM_021139      | 2.302          | 2.290   | UDP glucuronosyltransferase 2 family, polypeptide B4                                         |
|                                             | CYP3A5      | NM_000777      | 1.893          | 2.007   | Cytochrome P450, family 3, subfamily A, polypeptide 5                                        |

|        |           |              |       |       |                                                         |
|--------|-----------|--------------|-------|-------|---------------------------------------------------------|
| Others | LOC55908  | NM_018687    | 3.186 | 2.572 | Hepatocellular carcinoma-associated gene TD26           |
|        | KLF9      | NM_001206    | 3.033 | 3.059 | Kruppel-like factor 9 (KLF9)                            |
|        | SCNN1A    | NM_001038    | 2.946 | 2.721 | Sodium channel, nonvoltage-gated 1 alpha                |
|        | HAMP      | NM_021175    | 2.471 | 2.098 | Hepcidin antimicrobial peptide                          |
|        | C14orf139 | XR_040801    | 2.172 | 2.124 | chromosome 14 open reading frame 139                    |
|        | LOX       | NM_002317    | 1.981 | 1.592 | Lysyl oxidase                                           |
|        | MMP11     | NM_005940    | 1.906 | 1.677 | Matrix metalloproteinase 11 (stromelysin 3)             |
|        | SAA4      | NM_006512    | 1.826 | 1.706 | Serum amyloid A4, constitutive                          |
|        | CA9       | NM_001216    | 1.760 | 1.559 | Carbonic anhydrase IX                                   |
|        | CEBPB     | NM_005194    | 1.750 | 1.650 | CCAAT/enhancer binding protein (C/EBP), beta            |
|        | HGFAC     | NM_001528    | 1.713 | 1.495 | HGF activator                                           |
|        | ABCC6     | NM_001079528 | 1.712 | 1.461 | ATP-binding cassette, sub-family C (CFTR/MRP), member 6 |

\* based on T<sub>3</sub> treated values

\*\*  $p \geq 0.05$



Table S7. Induced Genes HepG2 ( $\geq 1.7$  fold\*,  $p \leq 0.05$ )

| Category                                        | Gene Symbol | Accession.<br>No. | Fold Change    |         | Gene encoded Protein                                                                         |
|-------------------------------------------------|-------------|-------------------|----------------|---------|----------------------------------------------------------------------------------------------|
|                                                 |             |                   | T <sub>3</sub> | GC-1    |                                                                                              |
| Glucose metabolism                              | G6PC        | NM_000151         | 5.405          | 3.882   | Glucose-6-phosphatase, catalytic subunit                                                     |
|                                                 | PCK1        | NM_002591         | 2.723          | 2.073   | Phosphoenolpyruvate carboxykinase 1 (PEPCK)                                                  |
|                                                 | GBE1        | NM_000158         | 1.917          | 1.759   | Glucan (1, 4-alpha-), branching enzyme 1                                                     |
| Fat metabolism                                  | ACSM2       | NM_001010845      | 3.260          | 2.865   | Acyl-CoA synthetase medium-chain family member 2                                             |
|                                                 | CPT1A       | NM_001876         | 2.485          | 2.12    | Carnitine palmitoyltransferase 1A (liver) (isoform 1 )                                       |
|                                                 | CYP4F3      | NM_000896         | 2.081          | 1.808   | Cytochrome P450, family 4, subfamily F, polypeptide 3                                        |
|                                                 | ANGPTL4     | NM_139314         | 2.023          | 1.627   | Angiopoietin-like 4                                                                          |
| Bile acid/steroid metabolism                    | NR1H4       | NM_005123         | 1.883          | 1.781   | Nuclear receptor subfamily 1, group H, member 4) (FXR)                                       |
|                                                 | HSD17B2     | NM_002153         | 1.911          | 1.748   | Hydroxysteroid (17-beta) dehydrogenase 2                                                     |
| Amino acid metabolism/<br>transport             | SLC16A6     | NM_004694         | 3.017          | 2.367   | Solute carrier family 16, member 6 (monocarboxylic acid transporter 7)                       |
|                                                 | SLC1A2      | NM_004171         | 1.770          | 1.594   | Solute carrier family 1 (glial high affinity glutamate transporter), member 2                |
|                                                 | HAL         | NM_002108         | 1.862          | 1.287** | Histidine ammonia- lyase                                                                     |
|                                                 | ARG1        | NM_000045         | 1.701          | 1.443** | Arginase, liver                                                                              |
| Apoptosis                                       | TNFSF10     | NM_003810         | 2.917          | 2.380   | Tumor necrosis factor (ligand) superfamily, member 10                                        |
|                                                 | GADD45B     | NM_015675         | 1.843          | 1.762   | Growth arrest and DNA-damage-inducible, beta                                                 |
| Protein phosphorylation/<br>signal transduction | C8orf4      | NM_020130         | 2.228          | 2.081   | Chromosome 8 open reading frame 4                                                            |
|                                                 | SGK         | NM_005627         | 2.128          | 2.190   | Serum/glucocorticoid regulated kinase                                                        |
|                                                 | C10orf10    | NM_007021         | 2.007          | 1.952   | Chromosome 10 open reading frame 10                                                          |
|                                                 | TNS1        | NM_022648         | 1.913          | 1.565** | Tensin 1                                                                                     |
| Blood coagulation                               | FGA         | NM_000508         | 2.162          | 2.040   | Fibrinogen alpha chain (FGA), transcript variant alpha-E                                     |
|                                                 | SERPINE1    | NM_000602         | 1.923          | 1.484   | Serpin peptidase inhibitor, clade E(nexin, plasminogen activator inhibitor type 1), member 1 |
|                                                 | FGB         | NM_005141         | 1.741          | 1.654   | Fibrinogen beta chain                                                                        |
| Immune system<br>/complement activation         | C8B         | NM_000066         | 2.312          | 2.062   | Complement component 8, beta polypeptide                                                     |
|                                                 | CD14        | NM_000591         | 2.251          | 2.071   | CD14 molecule                                                                                |
|                                                 | C8A         | NM_000562         | 1.820          | 1.683   | Complement component 8, alpha polypeptide                                                    |
|                                                 | ISG20       | NM_002201         | 1.803          | 1.633   | Interferon stimulated exonuclease gene 20kDa                                                 |
|                                                 | EBI3        | NM_005755         | 1.709          | 1.546   | Epstein-Barr virus induced gene 3                                                            |
| Xenobiotics metabolism by P450                  | GSTA1       | NM_000846         | 3.112          | 2.632   | Glutathione S-transferase A1                                                                 |
|                                                 | UGT2B4      | NM_021139         | 2.302          | 2.290   | UDP glucuronosyltransferase 2 family, polypeptide B4                                         |
|                                                 | CYP3A5      | NM_000777         | 1.893          | 2.007   | Cytochrome P450, family 3, subfamily A, polypeptide 5                                        |

|        |           |              |       |       |                                                         |
|--------|-----------|--------------|-------|-------|---------------------------------------------------------|
| Others | LOC55908  | NM_018687    | 3.186 | 2.572 | Hepatocellular carcinoma-associated gene TD26           |
|        | KLF9      | NM_001206    | 3.033 | 3.059 | Kruppel-like factor 9 (KLF9)                            |
|        | SCNN1A    | NM_001038    | 2.946 | 2.721 | Sodium channel, nonvoltage-gated 1 alpha                |
|        | HAMP      | NM_021175    | 2.471 | 2.098 | Hepcidin antimicrobial peptide                          |
|        | C14orf139 | XR_040801    | 2.172 | 2.124 | chromosome 14 open reading frame 139                    |
|        | LOX       | NM_002317    | 1.981 | 1.592 | Lysyl oxidase                                           |
|        | MMP11     | NM_005940    | 1.906 | 1.677 | Matrix metalloproteinase 11 (stromelysin 3)             |
|        | SAA4      | NM_006512    | 1.826 | 1.706 | Serum amyloid A4, constitutive                          |
|        | CA9       | NM_001216    | 1.760 | 1.559 | Carbonic anhydrase IX                                   |
|        | CEBPB     | NM_005194    | 1.750 | 1.650 | CCAAT/enhancer binding protein (C/EBP), beta            |
|        | HGFAC     | NM_001528    | 1.713 | 1.495 | HGF activator                                           |
|        | ABCC6     | NM_001079528 | 1.712 | 1.461 | ATP-binding cassette, sub-family C (CFTR/MRP), member 6 |

\* based on T<sub>3</sub> treated values

\*\*  $p \geq 0.05$

Table S8. HepG2 Inhibited Genes ( $p \leq 0.05$ )

| Gene Symbol | Accession. No. | % of Control   |       | Gene encoded Protein                                                                          | Biological process                                               |
|-------------|----------------|----------------|-------|-----------------------------------------------------------------------------------------------|------------------------------------------------------------------|
|             |                | T <sub>3</sub> | GC-1  |                                                                                               |                                                                  |
| SLC2A1      | NM_006516      | 48.2           | 56.8  | solute carrier family 2 (facilitated glucose transporter), member 1                           | A major glucose transporter in the mammalian blood-brain barrier |
| KIAA1199    | NM_018689      | 52.5           | 63.2  | KIAA1199 protein (KIAA1199)                                                                   | Cell mortality                                                   |
| HS3ST3A1    | NM_006042      | 56.5           | 69.1* | Heparan sulfate (glucosamine) 3-O-sulfotransferase 3A1                                        | multiple biologic activities                                     |
| FAM46A      | NM_017633      | 60.2           | 59.5  | family with sequence similarity 46, member A                                                  | (multi-function?)                                                |
| SORBS1      | NM_015385      | 61.3           | 69.5* | Sorbin and SH3 domain containing 1                                                            | Insulin signaling pathway                                        |
| CD24        | NM_013230      | 62.7           | 63.0  | CD24 molecule                                                                                 | Signal transduction                                              |
| SCGN        | NM_006998      | 63.5           | 71.3* | secretagogin, EF-hand calcium binding protein                                                 | Cell proliferation                                               |
| SERPINE2    | NM_006216      | 69.8           | 81.7* | serpin peptidase inhibitor, clade E (nexin, plasminogen activator inhibitor type 1), member 2 | Anti-coagulant                                                   |
| PLA2G2A     | NM_000300      | 70.1           | 83.4* | phospholipase A2, group IIA (platelets, synovial fluid)                                       | Lipid metabolism                                                 |
| SLC1A4      | NM_003038      | 73.0           | 74.2  | solute carrier family 1 (glutamate/neutral amino acid transporter), member 4                  | Amino acid transport                                             |

\*  $p \geq 0.05$

## **Supplimental links**

### **SLC2A1**

1. [http://www.ncbi.nlm.nih.gov/sites/entrez?cmd=Retrieve&db=pubmed&list\\_uids=3839598](http://www.ncbi.nlm.nih.gov/sites/entrez?cmd=Retrieve&db=pubmed&list_uids=3839598) (<http://links.jstor.org/sici?sici=0036-8075%2819850906%293%3A229%3A4717%3C941%3ASASOAH%3E2.0.CO%3B2-S>)
2. <http://www.ncbi.nlm.nih.gov/sites/entrez>

### **HS3ST3A1**

<http://www.jbc.org/cgi/reprint/270/19/11267>

### **FAM46A**

[http://www.ncbi.nlm.nih.gov/entrez/viewer.fcgi?val=NLM\\_017633.2&dopt=gb](http://www.ncbi.nlm.nih.gov/entrez/viewer.fcgi?val=NLM_017633.2&dopt=gb)

### **KIAA1199**

[http://www.sciencedirect.com/science?\\_ob=ArticleURL&\\_udi=B6T54-4H3938N-3&\\_user=4430&\\_rdoc=1&\\_fmt=&\\_orig=search&\\_sort=d&view=c&\\_acct=C000059594&\\_version=1&\\_urlVersion=0&\\_userid=4430&md5=7011641dd6d664f97d08febf1b9843f](http://www.sciencedirect.com/science?_ob=ArticleURL&_udi=B6T54-4H3938N-3&_user=4430&_rdoc=1&_fmt=&_orig=search&_sort=d&view=c&_acct=C000059594&_version=1&_urlVersion=0&_userid=4430&md5=7011641dd6d664f97d08febf1b9843f)

### **SORBS1**

1. [http://www.sciencedirect.com/science?\\_ob=ArticleURL&\\_udi=B6WG1-458NMWP-40&\\_user=4430&\\_rdoc=1&\\_fmt=&\\_orig=search&\\_sort=d&view=c&\\_acct=C000059594&\\_version=1&\\_urlVersion=0&\\_userid=4430&md5=765cc12bc1c88490e07afeb43412a616](http://www.sciencedirect.com/science?_ob=ArticleURL&_udi=B6WG1-458NMWP-40&_user=4430&_rdoc=1&_fmt=&_orig=search&_sort=d&view=c&_acct=C000059594&_version=1&_urlVersion=0&_userid=4430&md5=765cc12bc1c88490e07afeb43412a616)
2. <http://www.nature.com/nm/journal/v13/n4/abs/nm1550.html;jsessionid=239FFC960CE234DFFF9D0A16D3D6628E>

### **SCGN:**

<http://www.jbc.org/cgi/content/full/275/32/24740>

### **SERPINE2:**

<http://circres.ahajournals.org/cgi/reprint/100/8/1174>

### **PLA2G2A:**

[http://www.ncbi.nlm.nih.gov/pubmed/17892360?ordinalpos=1&itool=EntrezSystem2.PEntrez.Pubmed.Pubmed\\_ResultsPanel.Pubmed\\_RVDocSum](http://www.ncbi.nlm.nih.gov/pubmed/17892360?ordinalpos=1&itool=EntrezSystem2.PEntrez.Pubmed.Pubmed_ResultsPanel.Pubmed_RVDocSum)

### **SLC1A4**

1. <http://www.jbc.org/cgi/reprint/268/21/15329>
2. [http://www.sciencedirect.com/science?\\_ob=ArticleURL&\\_udi=B6WG1-45PMRX4-BX&\\_user=4430&\\_rdoc=1&\\_fmt=&\\_orig=search&\\_sort=d&view=c&\\_acct=C000059594&\\_version=1&\\_urlVersion=0&\\_userid=4430&md5=4b1b514b9df5d3c2d1052c19ed285b2f](http://www.sciencedirect.com/science?_ob=ArticleURL&_udi=B6WG1-45PMRX4-BX&_user=4430&_rdoc=1&_fmt=&_orig=search&_sort=d&view=c&_acct=C000059594&_version=1&_urlVersion=0&_userid=4430&md5=4b1b514b9df5d3c2d1052c19ed285b2f)

|         | T <sub>3</sub> | GC-1 |
|---------|----------------|------|
| THRSP   | 2.4            | 1.3  |
| ANGPTL4 | 1.6            | 5.3  |
| CPT1A   | 1.1            | 1.0  |
| G6PC    | 1.7            | 0.8  |

**Table S9.** Average EC<sub>50</sub> values (nM) for induction of selected TR-regulated genes derived from dose response curves obtained with T<sub>3</sub> and GC-1 (n=4).

Table S10. Possible TREs near ANGPTL4 gene, only the 3' DR-4 element was verified as functional.

| Number | Location/Type | Sequence (5'->3') |
|--------|---------------|-------------------|
| 1      | -12kbp IR-1   | TGACCTgAGGTCA     |
| 2      | -11kbp IR-1   | TGACCTgAGGTCA     |
| 3      | -5kbp IR-1    | TGACCTgAGGTCA     |
| 4      | -4kbp IR-1    | TGACCTgAGGTCA     |
| 5      | -2Kb IR-1     | TGACCTgAGGTCA     |
| 6      | + 136bp DR-4  | AGGTCActtgAGGTCA  |

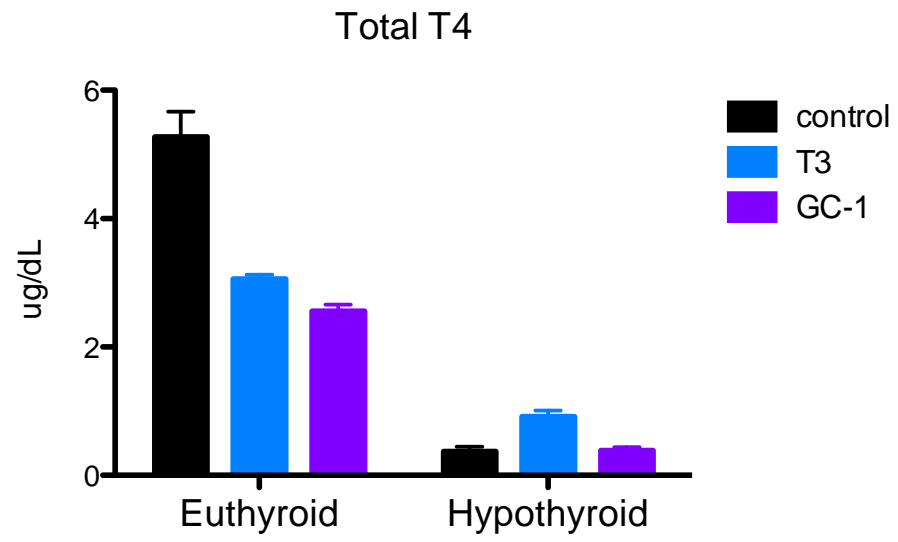

Fig. S1.

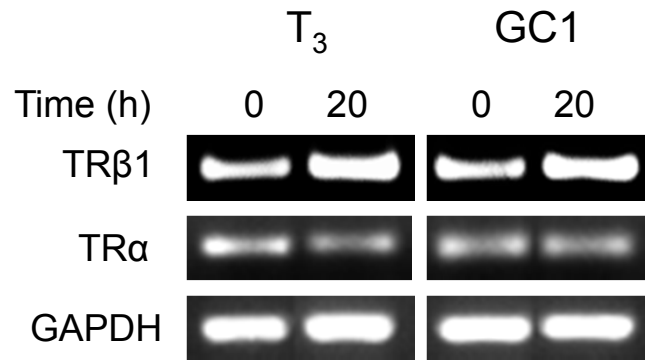

Fig. S2.



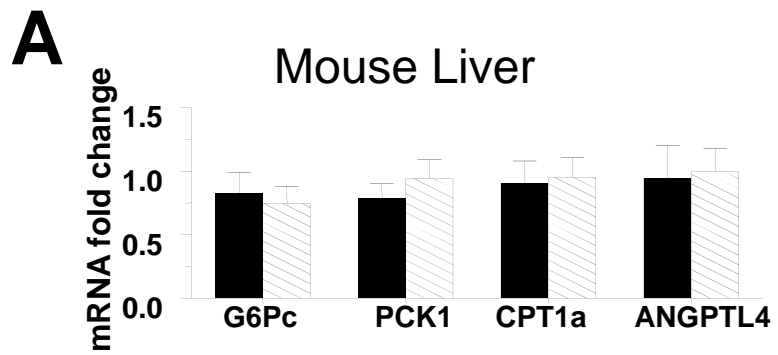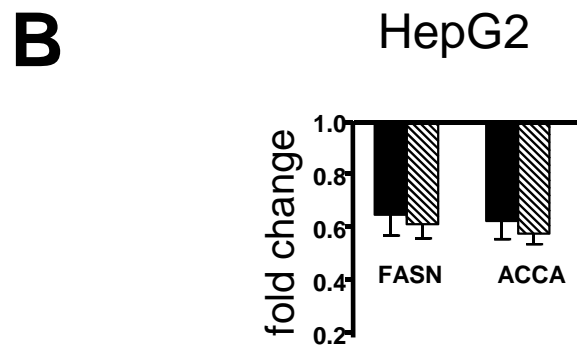

Fig. S3.

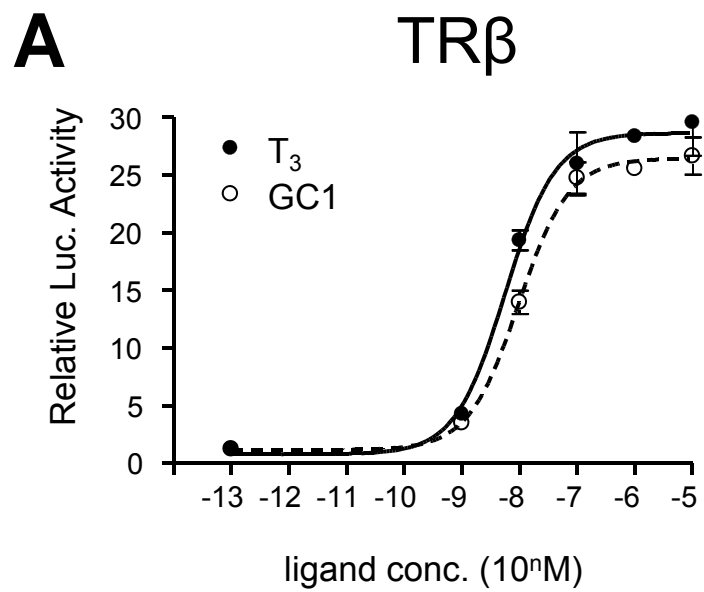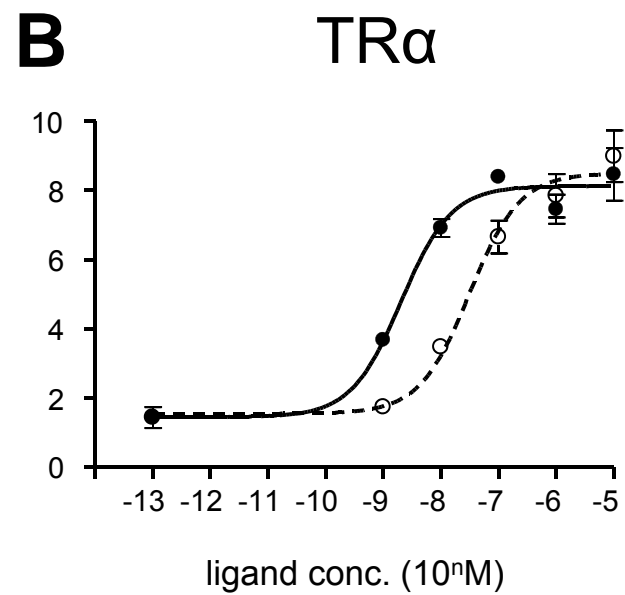

Fig. S4.
